## Retraction: Serum amyloid a induces M2b-like macrophage polarization during liver inflammation

Yibin Wang<sup>1,\*</sup>, Haijun Huang<sup>2,\*</sup>, Renhua Sun<sup>3</sup>, Bingyu Chen<sup>4,5</sup>, Fang Han<sup>3</sup>, Qian Li<sup>3</sup>, Yin Ni<sup>3</sup>, Xi Li<sup>6</sup>, Jingquan Liu<sup>3</sup>, Xiaozhou Mou<sup>7,8</sup> and Yuexing Tu<sup>3</sup>

<sup>1</sup>Department of Cardiology, Chunan First People's Hospital, Hangzhou 311700, China

<sup>2</sup>Department of Infectious Diseases, Zhejiang Provincial People's Hospital, People's Hospital of Hangzhou Medical College, Hangzhou 310014, China

<sup>3</sup>ICU Department, Zhejiang Provincial People's Hospital, People's Hospital of Hangzhou Medical College, Hangzhou 310014, China

<sup>4</sup>Centre of Laboratory Medicine, Chunan First People's Hospital, Hangzhou 311700, China

<sup>5</sup>Department of Transfusion Medicine, Zhejiang Provincial People's Hospital, People's Hospital of Hangzhou Medical College, Hangzhou 310014, China

<sup>6</sup>Centre of Laboratory Medicine, Zhejiang Provincial People's Hospital, People's Hospital of Hangzhou Medical College, Hangzhou 310014, China

<sup>7</sup>Clinical Research Institute, Zhejiang Provincial People's Hospital, People's Hospital of Hangzhou Medicine College, Hangzhou 310014, China

<sup>8</sup>Key Laboratory of Tumor Molecular Diagnosis and Individualized Medicine of Zhejiang Province, Hangzhou 310014, China

\* These authors have contributed equally to this work

**Published:** October 04, 2023

**Copyright:** © 2023 Wang et al. This is an open access article distributed under the terms of the [Creative Commons Attribution License](#) (CC BY 3.0), which permits unrestricted use, distribution, and reproduction in any medium, provided the original author and source are credited.

**This article has been retracted:** Due to defects in the experimental results and methods, the conclusions of this paper are invalid. The authors were unable to verify or replicate the experiments. As a result, with the agreement of all authors, Oncotarget has decided to retract this paper.

Original article: Oncotarget. 2017; 8:109238–109246. <https://doi.org/10.18632/oncotarget.22652>
